# Supplementary material
Source: Research Square preprint supplement (doi:10.21203/rs.3.rs-10217700/v1)
Supplement: Supplementary file 1 [file c8733055c6ef88b6fff2905f.docx]

**Supplementary Information to: Offshore oysterreef habitat restoration: Community structure after five years and implications for conservation management**

Santiago E.A. Pineda-Metz1*, Heike Lippert2, Bernadette Pogoda1

Supplementary Table 1: Mean abundance (%-cover) and standard error for each taxon and operational taxonomic unit (OTU) identified in the seabed images taken at each monitoring year.

| Year | 2021 | 2022 | 2024 | 2025 |
| --- | --- | --- | --- | --- |
| *Halichondria panicea* | - | 0.05 (± 0.03) | 0.11 (± 0.06) | 0.59 (± 0.29) |
| Leptothecata indet. | 0.01 (± 0.01) | 1.05 (± 0.24) | 20.62 (± 1.1) | 0.21 (± 0.19) |
| *Tubularia* sp. | - | 1.97 (± 0.36) | 2.82 (± 0.47) | 0.03 (± 0.02) |
| Sertulariidae indet. | < 0.01 (± < 0.01) | 0.62 (± 0.28) | 0.39 (± 0.19) | 0.21 (± 0.10) |
| Hydrozoa OTU 1 | - | 0.07 (± 0.06) | 0.30 (± 0.18) | - |
| Hydrozoa OTU 2 | - | - | 0.69 (± 0.27) | - |
| Hydrozoa OTU 3 | - | - | 0.35 (± 0.31) | - |
| Hydrozoa OTU 4 | - | - | 0.11 (± 0.06) | 0.23 (± 0.20) |
| Hydrozoa indet. | - | - | - | 0.01 (± 0.01) |
| *Metridium senile* | 0.97 (± 0.14) | 2.13 (± 0.36) | 11.18 (± 1.07) | 5.52 (± 1.35) |
| *Urticina felina* | - | < 0.01 (± < 0.01) | - | - |
| *Cerianthus* sp. | - | < 0.01 (± < 0.01) | - | - |
| Sagartiidae indet. | 1.34 (± 0.15) | 0.95 (± 0.1) | 0.34 (± 0.06) | 1.52 (± 0.55) |
| *Alcyonium digitatum* | - | 0.02 (± 0.01) | 8.85 (± 0.69) | 7.75 (± 1.07) |
| Bryozoa OTU 1 | - | 0.01 (± 0.01) | 0.13 (± 0.08) | 0.05 (± 0.03) |
| Bryozoa OTU 2 | - | < 0.01 (± < 0.01) | - | 0.02 (± 0.02) |
| Cheilostomatida OTU 1 | - | - | 0.01 (± 0.01) | - |
| *Ostrea edulis* | - | 0.01(± 0.01) | 0.04 (± 0.02) | 0.10 (± 0.03) |
| *Buccinum* sp. | - | - | 0.01 (± 0.01) | - |
| Amphipod tubes | - | - | - | 20.92 (± 1.88) |
| *Cancer pagurus* | 2.13 (± 0.46) | 1.88 (± 0.37) | 4.60 (± 0.43) | 5.33 (± 0.79) |
| *Homarus gammarus* | 0.08 (± 0.08) | - | 0.06 (± 0.03) | 0.29 (± 0.20) |
| *Liocarcinus* sp. | 0.36 (± 0.13) | 0.05 (± 0.05) | 0.03 (± 0.03) | 0.04 (± 0.04) |
| *Necora puber* | 0.50 (± 0.14) | 0.16 (± 0.07) | 0.15 (± 0.05) | 1.10 (± 0.23) |
| *Pagurus bernhardus* | - | - | 0.04 (± 0.04) | - |
| Echinoidea indet. | 0.01 (± 0.01) | - | - | - |
| *Asterias rubens* | 0.15 (± 0.04) | 0.43 (± 0.05) | 0.27 (± 0.03) | 3.15 (± 0.21) |
| *Astropecten irregularis* | - | < 0.01 (± < 0.01) | - | - |
| *Ophiura albida* | - | < 0.01 (± < 0.01) | - | - |
| *Ascidiella aspera* | - | - | - | 0.54 (± 0.26) |
| Ascidiacea OTU 1 | 0.51 (± 0.18) | 0.21 (± 0.10) | 0.17 (± 0.06) | 0.31 (± 0.12) |
| *Ctenolabrus rupestris* | 0.02 (± 0.01) | 0.02 (± 0.01) | 0.15 (± 0.04) | 0.22 (± 0.06) |
| *Callionymus lyra* | 0.06 (± 0.03) | 0.02 (± 0.01) | 0.01 (± 0.01) | 0.10 (± 0.07) |
| Gobiidae indet. | 0.01 (± 0.01) | - | - | 0.02 (± 0.02) |
| *Pholis gunnellus* | 0.02 (± 0.01) | 0.02 (± 0.01) | 0.04 (± 0.02) | 0.18 (± 0.07) |
| *Taurulus bubalis* | - | 0.03 (± 0.03) | - | 0.01 (± 0.01) |
| *Limanda limanda* | - | 0.04 (± 0.04) | - | 0.05 (± 0.05) |
| Labridae OTU 1 | - | - | 0.01 (± 0.01) | - |
| Cottidae OTU 1 | - | - | - | 0.03 (± 0.03) |
| Fish | 0.01 (± 0.01) | < 0.01 (± < 0.01) | 0.01 (± 0.01) | - |
| Unidentified | 0.40 (± 0.40) | 0.01 (± 0.01) | 0.28 (± 0.10) | 0.05 (± 0.04) |
| Total | 6.57 (± 0.59) | 9.79 (± 0.72) | 51.73 (± 1.35) | 48.54 (± 1.98) |
